# Supplementary material for: Bread Biopreservation through the Addition of Lactic Acid Bacteria in Sourdough
Source: MDPI journal article supplement (doi:10.3390/foods12040864), 2023-02-17
Supplement: s1 [file s1]

# Bread biopreservation through the addition of lactic acid bacteria in sourdough

**Francisco Illueca<sup>1,†</sup>, Ana Moreno<sup>2,†</sup>, Jorge Calpe<sup>2</sup>, Tiago Melo Nazareth<sup>1,\*</sup>, Victor D'Opazo<sup>1</sup>, Giuseppe Meca<sup>1</sup>, Juan Manuel Quiles<sup>1</sup>, and Carlos Luz<sup>1</sup>**

<sup>1</sup> Department of Food Science and Toxicology, Faculty of Pharmacy, University of Valencia, Ave. Vicent Andrés Estellés s/n, 46100, Burjassot, Spain

<sup>2</sup> AgrotechUV incubator, Scientific Park of University of Valencia, St. Catedrático Agustín Escardino 9, 46980, Paterna, Spain.

\* Correspondence: tiago@uv.es; Tel.: +34963544959

† These authors contributed equally to this work and should be considered co-first authors.

Table S1. Results of volatile compounds identified in doughs before fermentation, after fermentation and after baked breads.

| Peak            | Rt    | Compound                             | Identification | LRI DB5 | LRI lit |
|-----------------|-------|--------------------------------------|----------------|---------|---------|
| <b>Acid</b>     |       |                                      |                |         |         |
| 1               | 4.26  | Propanoic acid                       | MS             |         |         |
| 2               | 6.22  | Hexanoic acid                        | MS + LRI       | 979     | 978     |
| <b>Alcohol</b>  |       |                                      |                |         |         |
| 3               | 3.41  | 1-Butanol, 3-methyl                  | MS             |         |         |
| 4               | 6.18  | 1-Hexanol                            | MS + LRI       | 877     | 878     |
| 5               | 8.69  | 1-Heptanol                           | MS + LRI       | 980     | 977     |
| 6               | 8.71  | 1-Octen-3-ol                         | MS + LRI       | 980     | 978     |
| 7               | 9.14  | 5-Hepten-2-ol, 6-methyl              | MS + LRI       | 998     | 994     |
| 8               | 10.05 | 1-Hexanol, 2 ethyl                   | MS + LRI       | 1034    | 1038    |
| 9               | 11.18 | 1-Octanol                            | MS + LRI       | 1079    | 1076    |
| 10              | 13.29 | 3-Nonen-1-ol                         | MS + LRI       | 1167    | 1157    |
| 11              | 13.59 | 1-Nonanol                            | MS + LRI       | 1179    | 1172    |
| <b>Aldehyde</b> |       |                                      |                |         |         |
| 12              | 3.97  | Hexanal                              | MS             |         |         |
| 13              | 6.26  | Heptanal                             | MS + LRI       | 881     | 882     |
| 14              | 8.23  | 2-Heptenal                           | MS + LRI       | 960     | 961     |
| 15              | 8.54  | Benzaldehyde                         | MS + LRI       | 974     | 970     |
| 16              | 8.84  | Octanal                              | MS + LRI       | 986     | 981     |
| 17              | 9.72  | 2,4-Heptadienal                      | MS + LRI       | 1020    | 1013    |
| 18              | 9.82  | 5-Ethylcyclopent-1-enecarboxaldehyde | MS + LRI       | 1025    | 1026    |
| 19              | 10.89 | 2-Octenal                            | MS + LRI       | 1068    | 1071    |
| 20              | 11.04 | Benzeneacetaldehyde                  | MS + LRI       | 1074    | 1074    |
| 21              | 11.42 | Nonanal                              | MS + LRI       | 1089    | 1089    |
| 22              | 13.42 | 2-Nonenal                            | MS + LRI       | 1172    | 1168    |
| 23              | 13.91 | Decanal                              | MS + LRI       | 1192    | 1188    |

|               |       |                                     |          |      |      |
|---------------|-------|-------------------------------------|----------|------|------|
| 24            | 15.12 | 2,4-Nonadienal                      | MS + LRI | 1245 | 1236 |
| 25            | 15.82 | 2-Decenal                           | MS + LRI | 1276 | 1274 |
| 26            | 16.93 | 2,4-Decadienal                      | MS + LRI | 1326 | 1325 |
| 27            | 18.12 | 2-Undecenal                         | MS + LRI | 1381 | 1373 |
| <b>Alkane</b> |       |                                     |          |      |      |
| 28            | 9.23  | Undecane                            | MS + LRI | 1100 | 1100 |
| 29            | 14.09 | Tridecane                           | MS + LRI | 1300 | 1300 |
| 30            | 16.36 | Tetradecane                         | MS + LRI | 1400 | 1400 |
| 31            | 22.49 | Heptadecane                         | MS + LRI | 1700 | 1700 |
| <b>Ester</b>  |       |                                     |          |      |      |
| 32            | 3.64  | Butanoic acid ethyl ester           | MS       |      |      |
| 33            | 5.27  | Acetic acid, pentyl ester           | MS + LRI | 837  | 859  |
| 34            | 5.77  | Pentanoic acid, ethyl ester         | MS + LRI | 859  | 871  |
| 35            | 10.62 | Isobutyric acid, pentyl ester       | MS + LRI | 1057 | 1057 |
| 36            | 10.72 | Heptanoic acid, ethyl ester         | MS + LRI | 1061 | 1081 |
| 37            | 10.95 | Propanoic acid, hexyl ester         | MS + LRI | 1070 | 1089 |
| 38            | 11.48 | 2,4-Hexadienoic acid, ethyl ester   | MS + LRI | 1091 | 1093 |
| 39            | 11.52 | Benzoic acid, methyl ester          | MS + LRI | 1092 | 1094 |
| 40            | 13.03 | Isobutyric acid, hexyl ester        | MS + LRI | 1156 | 1151 |
| 41            | 13.16 | Octanoic acid, ethyl ester          | MS + LRI | 1161 | 1173 |
| 42            | 15.48 | Nonanoic acid, ethyl ester          | MS + LRI | 1261 | 1268 |
| 43            | 15.74 | Acetic acid, 2-phenyl ethyl ester   | MS + LRI | 1272 | 1264 |
| 44            | 17.69 | Decanoic acid, ethyl ester          | MS + LRI | 1361 | 1373 |
| 45            | 17.78 | Propanoic acid, 2-phenylethyl ester | MS + LRI | 1365 | 1353 |
| 46            | 21.77 | Dodecanoic acid, ethyl ester        | MS + LRI | 1562 | 1566 |
| 47            | 27.43 | Hexadecanoic acid, ethyl ester      | MS       |      |      |
| <b>Ketone</b> |       |                                     |          |      |      |
| 48            | 7.27  | 2-Heptanone, 4-methyl               | MS + LRI | 923  | 936  |
| 49            | 8.32  | 1-Octen-3-one                       | MS + LRI | 965  | 962  |
| 50            | 8.43  | 3-Octanone                          | MS + LRI | 969  | 971  |

|                |       |                 |          |      |      |
|----------------|-------|-----------------|----------|------|------|
| 51             | 8.6   | 2,5-Octanedione | MS + LRI | 976  | 983  |
| 52             | 10.38 | 3-Octen-2-one   | MS + LRI | 1047 | 1046 |
| 53             | 11.3  | 2-Nonanone      | MS + LRI | 1084 | 1089 |
| 54             | 16.12 | 2-Undecanone    | MS + LRI | 1289 | 1291 |
| <b>Terpene</b> |       |                 |          |      |      |
| 55             | 7.93  | D-Limonene      | MS + LRI | 1049 | 1039 |
| 56             | 11.57 | Linalool        | MS + LRI | 1095 | 1098 |

Table S2. Relative area percentage of volatile organic compounds in doughs at time point zero. (C): control group without sourdough; (SC<sub>1</sub>): control sourdough with spontaneous fermentation; (SC<sub>2</sub>): control sourdough with spontaneous fermentation plus propionate; (S<sub>1</sub>): sourdough group with 0.5% of lyophilized *Lactobacillus. plantarum* 5L1; and (S<sub>2</sub>): sourdough group with 5% of lyophilized *L. plantarum* 5L1.

| Peak            | Compound                             | C            | SC <sub>1</sub> | SC <sub>2</sub> | S <sub>1</sub> | S <sub>2</sub> |
|-----------------|--------------------------------------|--------------|-----------------|-----------------|----------------|----------------|
| <b>Acid</b>     |                                      | <b>n.d</b>   | <b>n.d</b>      | <b>23.50</b>    | <b>n.d</b>     | <b>n.d</b>     |
| 1               | Propanoic acid                       | n.d          | n.d             | 12.10           | n.d            | n.d            |
| 2               | Hexanoic acid                        | n.d          | n.d             | 11.40           | n.d            | n.d            |
| <b>Alcohol</b>  |                                      | <b>40.10</b> | <b>25.10</b>    | <b>22.00</b>    | <b>50.80</b>   | <b>45.90</b>   |
| 3               | 1-Butanol, 3-methyl                  | 12.30        | 2.90            | 13.10           | 13.50          | 15.50          |
| 4               | 1-Hexanol                            | 9.40         | 6.30            | n.d             | 24.00          | 15.50          |
| 5               | 1-Octen-3-ol                         | 8.70         | 8.10            | 6.00            | 10.40          | 11.60          |
| 6               | 5-Hepten-2-ol, 6-methyl              | 0.40         | 0.80            | 0.40            | 0.40           | 0.50           |
| 7               | 1-Hexanol, 2 ethyl                   | 2.40         | 3.80            | 0.40            | 0.50           | 0.40           |
| 8               | 1-Octanol                            | 1.60         | 1.30            | 1.10            | 1.40           | 1.40           |
| 9               | 3-Nonen-1-ol                         | 4.10         | 1.20            | 0.50            | 0.30           | 0.40           |
| 10              | 1-Nonanol                            | 1.20         | 0.70            | 0.50            | 0.30           | 0.60           |
| <b>Aldehyde</b> |                                      | <b>39.00</b> | <b>43.80</b>    | <b>25.20</b>    | <b>30.60</b>   | <b>24.60</b>   |
| 11              | Hexanal                              | 2.00         | 6.40            | n.d             | 12.50          | 3.90           |
| 12              | Heptanal                             | n.d          | 1.40            | 3.30            | n.d            | n.d            |
| 13              | 2-Heptenal                           | 5.00         | 3.10            | 3.70            | 5.30           | 6.50           |
| 14              | Benzaldehyde                         | n.d          | 0.40            | n.d             | n.d            | n.d            |
| 15              | Octanal                              | 0.50         | 1.00            | 0.60            | 1.10           | 1.10           |
| 16              | 2,4-Heptadienal                      | n.d          | n.d             | n.d             | 0.30           | 0.40           |
| 17              | 5-Ethylcyclopent-1-enecarboxaldehyde | 1.00         | 1.70            | 2.50            | 1.50           | 1.80           |
| 18              | 2-Octenal                            | 1.70         | 2.90            | 3.30            | 3.20           | 3.00           |
| 19              | Benzeneacetaldehyde                  | 9.20         | 0.30            | 0.50            | 0.60           | 0.30           |
| 20              | Nonanal                              | 1.00         | 2.30            | 3.60            | 1.40           | 2.30           |
| 21              | 2-Nonenal                            | 11.80        | 3.10            | 4.90            | 1.60           | 2.50           |

|                |                               |              |              |              |              |              |
|----------------|-------------------------------|--------------|--------------|--------------|--------------|--------------|
| 22             | Decanal                       | 6.40         | 20.30        | 0.90         | 0.40         | 0.90         |
| 23             | 2,4-Nonadienal                | n.d          | n.d          | 1.10         | 1.00         | 0.40         |
| 24             | 2,4-Decadienal                | 0.50         | 0.90         | 0.80         | 1.30         | 1.50         |
| 25             | 2-Undecenal                   | n.d          | n.d          | n.d          | 0.40         | n.d          |
| <b>Alkane</b>  |                               | <b>0.50</b>  | <b>0.90</b>  | <b>2.70</b>  | <b>0.70</b>  | <b>0.80</b>  |
| 26             | Tridecane                     | n.d          | n.d          | 0.90         | 0.40         | 0.40         |
| 27             | Tetradecane                   | 0.20         | 0.90         | 1.60         | 0.30         | 0.40         |
| 28             | Heptadecane                   | 0.30         | n.d          | 0.20         | n.d          | n.d          |
| <b>Ester</b>   |                               | <b>1.10</b>  | <b>3.80</b>  | <b>2.30</b>  | <b>n.d</b>   | <b>0.40</b>  |
| 29             | Isobutyric acid, pentyl ester | n.d          | 0.60         | n.d          | n.d          | n.d          |
| 30             | Isobutyric acid, hexyl ester  | n.d          | 2.20         | 2.30         | n.d          | n.d          |
| 31             | Octanoic acid, ethyl ester    | 0.80         | n.d          | n.d          | n.d          | 0.40         |
| 32             | Nonanoic acid, ethyl ester    | n.d          | 1.00         | n.d          | n.d          | n.d          |
| 33             | Decanoic acid, ethyl ester    | 0.30         | n.d          | n.d          | n.d          | n.d          |
| <b>Ketone</b>  |                               | <b>2.90</b>  | <b>3.40</b>  | <b>5.50</b>  | <b>6.00</b>  | <b>7.80</b>  |
| 34             | 2-Heptanone, 4-methyl         | n.d          | 0.40         | n.d          | n.d          | 0.30         |
| 35             | 1-Octen-3-one                 | n.d          | n.d          | 2.30         | 2.60         | 3.30         |
| 36             | 3-Octanone                    | 1.50         | n.d          | n.d          | 1.00         | n.d          |
| 37             | 2,5-Octanedione               | 0.40         | 1.00         | 1.30         | 0.80         | 0.90         |
| 38             | 3-Octen-2-one                 | 0.40         | 0.80         | 1.00         | 0.90         | 1.40         |
| 39             | 2-Nonanone                    | 0.60         | 0.90         | 0.90         | 0.70         | 1.40         |
| 40             | 2-Undecanone                  | n.d          | 0.30         | n.d          | n.d          | 0.50         |
| <b>Terpene</b> |                               | <b>16.30</b> | <b>22.60</b> | <b>18.70</b> | <b>12.00</b> | <b>20.70</b> |
| 41             | D-Limonene                    | 6.80         | 10.80        | 7.00         | 4.40         | 9.30         |
| 42             | Linalool                      | 9.50         | 11.80        | 11.70        | 7.60         | 11.40        |

Table S3. Relative area percentage of volatile organic compounds in fermented doughs. (C): control group without sourdough; (SC<sub>1</sub>): control sourdough with spontaneous fermentation; (SC<sub>2</sub>): control sourdough with spontaneous fermentation plus propionate; (S<sub>1</sub>): sourdough group with 0.5% of lyophilized *Lactobacillus. plantarum* 5L1; and (S<sub>2</sub>): sourdough group with 5% of lyophilized *L. plantarum* 5L1.

| Peak            | Compound                             | C            | SC <sub>1</sub> | SC <sub>2</sub> | S <sub>1</sub> | S <sub>2</sub> |
|-----------------|--------------------------------------|--------------|-----------------|-----------------|----------------|----------------|
| <b>Acid</b>     |                                      | <b>n.d</b>   | <b>n.d</b>      | <b>2.65</b>     | <b>n.d</b>     | <b>n.d</b>     |
| 1               | Propanoic acid                       | n.d          | n.d             | 2.65            | n.d            | n.d            |
| <b>Alcohol</b>  |                                      | <b>36.15</b> | <b>22.31</b>    | <b>15.54</b>    | <b>26.16</b>   | <b>16.99</b>   |
| 3               | 1-Butanol, 3-methyl                  | 19.84        | 16.43           | 4.89            | 19.8           | 11.51          |
| 4               | 1-Hexanol                            | 6.94         | 1.43            | 3.12            | 1.14           | 1.00           |
| 5               | 1-Heptanol                           | n.d          | 0.59            | n.d             | n.d            | n.d            |
| 6               | 1-Octen-3-ol                         | 5.36         | 1.60            | 4.17            | 2.44           | 2.50           |
| 7               | 5-Hepten-2-ol, 6-methyl              | 0.36         | n.d             | n.d             | n.d            | n.d            |
| 8               | 1-Hexanol, 2 ethyl                   | n.d          | 0.45            | 0.44            | n.d            | n.d            |
| 9               | 1-Octanol                            | 0.75         | 1.19            | 1.94            | 1.19           | 0.90           |
| 10              | 3-Nonen-1-ol                         | 1.81         | 0.32            | 0.50            | 0.42           | 0.45           |
| 11              | 1-Nonanol                            | 1.09         | 0.30            | 0.48            | 1.17           | 0.63           |
| <b>Aldehyde</b> |                                      | <b>34.38</b> | <b>42.2</b>     | <b>58.84</b>    | <b>23.09</b>   | <b>23.19</b>   |
| 12              | Hexanal                              | 2.23         | 4.85            | 20.39           | 3.91           | 1.38           |
| 13              | Heptanal                             | n.d          | 0.44            | n.d             | 0.91           | n.d            |
| 14              | 2-Heptenal                           | 9.50         | 9.32            | 8.26            | 12.75          | 12.38          |
| 15              | Benzaldehyde                         | 0.44         | n.d             | 0.26            | n.d            | n.d            |
| 16              | Octanal                              | 0.43         | 0.19            | 0.95            | 0.41           | 0.35           |
| 17              | 2,4-Heptadienal                      | n.d          | n.d             | 0.26            | n.d            | n.d            |
| 18              | 5-Ethylcyclopent-1-enecarboxaldehyde | 0.92         | 0.74            | 1.94            | 0.23           | 0.26           |
| 19              | 2-Octenal                            | 1.44         | 2.44            | 6.44            | 1.45           | 1.12           |
| 20              | Benzeneacetaldehyde                  | 3.00         | 0.20            | 0.22            | 0.21           | 0.25           |
| 21              | Nonanal                              | 0.78         | 0.83            | 1.55            | 0.83           | 0.61           |

|               |                                     |              |              |              |              |              |
|---------------|-------------------------------------|--------------|--------------|--------------|--------------|--------------|
| 22            | 2-Nonenal                           | 9.81         | 18.98        | 6.62         | n.d          | 5.37         |
| 23            | Decanal                             | 4.83         | 2.65         | 5.88         | 0.48         | 0.34         |
| 24            | 2,4-Nonadienal                      | 0.43         | 0.55         | 1.87         | 0.72         | 0.37         |
| 25            | 2-Decenal                           | n.d          | n.d          | 0.74         | 0.46         | 0.25         |
| 26            | 2,4-Decadienal                      | 0.57         | 0.76         | 2.99         | 0.41         | 0.51         |
| 27            | 2-Undecenal                         | n.d          | 0.25         | 0.47         | 0.32         | n.d          |
| <b>Alkane</b> |                                     | <b>n.d</b>   | <b>0.27</b>  | <b>0.44</b>  | <b>0.31</b>  | <b>n.d</b>   |
| 30            | Tetradecane                         | n.d          | 0.27         | 0.44         | 0.31         | n.d          |
| <b>Ester</b>  |                                     | <b>17.97</b> | <b>32.18</b> | <b>15.32</b> | <b>42.76</b> | <b>30.71</b> |
| 32            | Butanoic acid ethyl ester           | 0.72         | 3.73         | 0.92         | 0.33         | 0.25         |
| 33            | Acetic acid, pentyl ester           | n.d          | 4.03         | n.d          | 8.97         | 2.40         |
| 34            | Pentanoic acid, ethyl ester         | 0.48         | n.d          | n.d          | 0.25         | n.d          |
| 35            | Isobutyric acid, pentyl ester       | 1.66         | 0.23         | 0.23         | n.d          | n.d          |
| 36            | Heptanoic acid, ethyl ester         | 0.82         | 0.92         | 0.82         | 1.31         | 1.41         |
| 37            | Propanoic acid, hexyl ester         | n.d          | n.d          | 0.61         | n.d          | n.d          |
| 38            | 2,4-Hexadienoic acid, ethyl ester   | n.d          | n.d          | n.d          | 0.25         | 3.70         |
| 40            | Isobutyric acid, hexyl ester        | n.d          | n.d          | 0.71         | n.d          | n.d          |
| 41            | Octanoic acid, ethyl ester          | 9.79         | 14.23        | 6.61         | 17.66        | 17.05        |
| 42            | Nonanoic acid, ethyl ester          | 0.35         | 0.55         | 1.74         | 0.79         | 0.72         |
| 43            | Acetic acid, 2-phenyl ethyl ester   | 0.47         | 1.12         | 0.43         | 2.80         | 0.67         |
| 44            | Decanoic acid, ethyl ester          | 3.23         | 6.67         | 1.91         | 9.01         | 3.73         |
| 45            | Propanoic acid, 2-phenylethyl ester | n.d          | n.d          | 0.69         | n.d          | n.d          |
| 46            | Dodecanoic acid, ethyl ester        | 0.45         | 0.32         | 0.22         | 0.56         | 0.30         |
| 47            | Hexadecanoic acid, ethyl ester      | n.d          | 0.38         | 0.43         | 0.83         | 0.48         |
| <b>Ketone</b> |                                     | <b>1.21</b>  | <b>0.47</b>  | <b>1.83</b>  | <b>4.44</b>  | <b>25.29</b> |
| 50            | 3-Octanone                          | n.d          | 0.24         | 0.37         | 3.71         | 24.3         |
| 51            | 2,5-Octanedione                     | 0.40         | n.d          | 0.57         | 0.20         | 0.32         |
| 52            | 3-Octen-2-one                       | 0.40         | n.d          | 0.23         | n.d          | n.d          |
| 53            | 2-Nonanone                          | 0.41         | 0.23         | 0.41         | 0.32         | 0.38         |



|                |              |              |             |             |             |             |
|----------------|--------------|--------------|-------------|-------------|-------------|-------------|
| 54             | 2-Undecanone | n.d          | n.d         | 0.25        | 0.21        | 0.29        |
| <b>Terpene</b> |              | <b>10.32</b> | <b>2.31</b> | <b>4.16</b> | <b>3.25</b> | <b>3.85</b> |
| 55             | D-Limonene   | 4.66         | 1.20        | 2.83        | 1.69        | 2.04        |
| 56             | Linalool     | 5.66         | 1.11        | 1.33        | 1.56        | 1.81        |

Table S4. Relative area percentage of volatile organic compounds in breads. (C): control group without sourdough; (SC<sub>1</sub>): control sourdough with spontaneous fermentation; (SC<sub>2</sub>): control sourdough with spontaneous fermentation plus propionate; (S<sub>1</sub>): sourdough group with 0.5% of lyophilized *Lactobacillus. plantarum* 5L1; and (S<sub>2</sub>): sourdough group with 5% of lyophilized *L. plantarum* 5L1.

| Peak            | Compound                             | C            | SC <sub>1</sub> | SC <sub>2</sub> | S <sub>1</sub> | S <sub>2</sub> |
|-----------------|--------------------------------------|--------------|-----------------|-----------------|----------------|----------------|
| <b>Acid</b>     |                                      | <b>n.d</b>   | <b>n.d</b>      | <b>12.78</b>    | <b>n.d</b>     | <b>n.d</b>     |
| 1               | Propanoic acid                       | n.d          | n.d             | 10.8            | n.d            | n.d            |
| 2               | Hexanoic acid                        | n.d          | n.d             | 1.98            | n.d            | n.d            |
| <b>Alcohol</b>  |                                      | <b>5.03</b>  | <b>8.36</b>     | <b>7.69</b>     | <b>13.34</b>   | <b>13.43</b>   |
| 3               | 1-Butanol, 3-methyl                  | 1.51         | 5.44            | 4.77            | 9.98           | 11.11          |
| 4               | 1-Hexanol                            | 0.50         | 0.61            | n.d             | 0.88           | 0.53           |
| 5               | 1-Octen-3-ol                         | 1.94         | 1.37            | 1.51            | 1.00           | 0.98           |
| 6               | 1-Hexanol, 2 ethyl                   | 0.54         | 0.50            | 0.78            | n.d            | n.d            |
| 7               | 1-Octanol                            | 0.54         | 0.44            | 0.63            | 0.61           | 0.44           |
| 8               | 1-Nonanol                            | n.d          | n.d             | n.d             | 0.87           | 0.37           |
| <b>Aldehyde</b> |                                      | <b>91.49</b> | <b>83.07</b>    | <b>73.41</b>    | <b>77.53</b>   | <b>69.81</b>   |
| 9               | Hexanal                              | 49.41        | 35.86           | 21.21           | 23.44          | 35.65          |
| 10              | Heptanal                             | 2.76         | 1.60            | 1.48            | 1.37           | 1.17           |
| 11              | 2-Heptenal                           | 3.63         | 3.20            | 2.51            | 3.76           | 3.01           |
| 12              | Benzaldehyde                         | 4.26         | 2.93            | 3.01            | 1.20           | 2.23           |
| 13              | Octanal                              | 3.24         | 1.72            | 0.92            | 0.96           | 1.71           |
| 14              | 2,4-Heptadienal                      | n.d          | 0.53            | n.d             | n.d            | n.d            |
| 15              | 5-Ethylcyclopent-1-enecarboxaldehyde | 2.53         | 0.96            | 0.90            | 0.77           | n.d            |
| 16              | 2-Octenal                            | 6.73         | 4.00            | 2.20            | 2.98           | 2.88           |
| 17              | Benzeneacetaldehyde                  | 0.52         | 0.56            | 6.32            | 1.50           | 6.66           |
| 18              | Nonanal                              | 3.99         | 3.00            | 2.17            | 1.41           | 1.92           |
| 19              | 2-Nonenal                            | 3.91         | 21.22           | 25.22           | 36.87          | 10.24          |
| 20              | Decanal                              | 2.19         | 3.82            | 6.05            | 1.16           | 2.03           |
| 21              | 2,4-Nonadienal                       | 3.63         | 1.46            | 0.90            | 1.05           | 1.04           |

|                |                                   |             |             |             |             |             |
|----------------|-----------------------------------|-------------|-------------|-------------|-------------|-------------|
| 22             | 2-Decenal                         | 2.29        | 1.24        | 0.52        | 0.69        | 0.87        |
| 23             | 2,4-Decadienal                    | 0.96        | 0.52        | n.d         | n.d         | n.d         |
| 24             | 2-Undecenal                       | 1.44        | 0.45        | n.d         | 0.37        | 0.40        |
| <b>Alkane</b>  |                                   | <b>0.62</b> | <b>1.21</b> | <b>0.87</b> | <b>n.d</b>  | <b>1.31</b> |
| 25             | Undecane                          | n.d         | 0.48        | n.d         | n.d         | 0.89        |
| 26             | Tetradecane                       | 0.62        | 0.73        | 0.87        | n.d         | 0.42        |
| <b>Ester</b>   |                                   | <b>n.d</b>  | <b>5.40</b> | <b>2.37</b> | <b>6.60</b> | <b>9.16</b> |
| 27             | Acetic acid, pentyl ester         | n.d         | 0.48        | n.d         | 0.59        | 4.53        |
| 28             | Isobutyric acid, pentyl ester     | n.d         | n.d         | n.d         | n.d         | 0.97        |
| 29             | 2,4-Hexadienoic acid, ethyl ester | n.d         | n.d         | n.d         | n.d         | 0.45        |
| 30             | Octanoic acid, ethyl ester        | n.d         | 2.69        | 1.42        | 3.33        | 2.01        |
| 31             | Acetic acid, 2-phenyl ethyl ester | n.d         | 0.67        | 0.45        | 1.35        | 0.40        |
| 32             | Decanoic acid, ethyl ester        | n.d         | 1.56        | 0.50        | 1.33        | 0.80        |
| <b>Ketone</b>  |                                   | <b>1.75</b> | <b>0.81</b> | <b>0.83</b> | <b>1.57</b> | <b>1.87</b> |
| 33             | 1-Octen-3-one                     | 1.10        | 0.81        | 0.83        | 1.12        | 1.38        |
| 34             | 3-Octanone                        | n.d         | n.d         | n.d         | 0.45        | 0.49        |
| 35             | 3-Octen-2-one                     | 0.65        | n.d         | n.d         | n.d         | n.d         |
| <b>Terpene</b> |                                   | <b>1.12</b> | <b>1.14</b> | <b>2.04</b> | <b>0.95</b> | <b>2.40</b> |
| 36             | D-Limonene                        | 0.59        | 0.77        | 1.17        | 0.53        | 1.91        |
| 37             | Linalool                          | 0.53        | 0.37        | 0.87        | 0.42        | 0.49        |
